# Supplementary material for: Ozone-Induced Rice Grain Yield Loss Is Triggered via a Change in Panicle Morphology That Is Controlled by ABERRANT PANICLE ORGANIZATION 1 Gene
Source: PubMed Central journal article supplement (PMC4414449; doi:10.1371/journal.pone.0123308), 2015-04-29

# Ozone-induced rice grain yield loss is triggered via a change in panicle morphology that is controlled by *ABERRANT PANICLE ORGANIZATION 1* gene

Keita Tsukahara, Hiroko Sawada, Yoshihisa Kohno, Takakazu Matsuura, Izumi C. Mori, Tomio Terao, Motohide Ioki and Masanori Tamaoki.

## S1 Supporting Information

**S1 Table A. Grain yield and number of primary rachis branches (PRB) grown at OTC in 2010, and conversion factors of CF to NF conditions.** Values show mean  $\pm$  SD (CF,  $n = 50$ ; NF,  $n = 25$ ). The mean ozone concentration during the daytime (6:00 to 18:00) was 2.0 nL L<sup>-1</sup> in charcoal-filtered (CF) and 36.2 nL L<sup>-1</sup> in non-filtered (NF) air. SL421 was a parental CSSL of SHA422-1.1 and SHA422-1.3.

|      |             |    | PRB            | Conversion factor | Grain yield (g) | Conversion factor |
|------|-------------|----|----------------|-------------------|-----------------|-------------------|
| 2010 | Sasanishiki | CF | 9.4 $\pm$ 1.1  | 1.006             | 11.6 $\pm$ 2.9  | 1.098             |
|      |             | NF | 10.9 $\pm$ 1.0 |                   | 13.2 $\pm$ 3.3  |                   |
|      | Habataki    | CF | 11.0 $\pm$ 0.8 | 1.028             | 12.7 $\pm$ 3.5  | 1.001             |
|      |             | NF | 12.9 $\pm$ 1.2 |                   | 13.1 $\pm$ 3.9  |                   |
|      | SL421       | CF | 12.7 $\pm$ 1.5 | 0.997             | 12.1 $\pm$ 3.9  | 0.940             |
|      |             | NF | 12.6 $\pm$ 1.0 |                   | 12.5 $\pm$ 3.0  |                   |

**S1 Table B. Effects of exposure to elevated ozone on grain yield and plant growth parameters in Sasanishiki and Habataki.** Values show mean  $\pm$  SD ( $n = 20$ ). n.s., not significant; \* $P < 0.1$ ; \*\* $P < 0.05$  (Student's  $t$ -test). AA, ambient air; O<sub>3</sub>, elevated ozone. Sasa, Sasanishiki; Haba, Habataki. LBS, leaf bronzing score; FGN, filled-grain number; SGN, sterile grain number; TGN, total grain number; NFP, number of filled grain per panicle; TGW, a thousand grain weight. LBS was defined using the following scale: 0, no visible damage; 1, very few small chlorotic spots; 2, very few small brown stipples; 3, 10%–20% of leaf area with chlorotic or brown stipples; 4, 20%–40% of leaf area with chlorotic or brown stipples; 5, >40% of leaf area with brown lesions; 6, >40% of leaf area with brown lesions and large necroses; 7, entire leaf dying (See [13]).

|      |      | LBS            |                   | Biomass (g)    |                  | Culm (cm) |                   | Culm number      |                  |      |
|------|------|----------------|-------------------|----------------|------------------|-----------|-------------------|------------------|------------------|------|
| 2009 | Sasa | AA             | 1.40 $\pm$ 0.55   | **             | 62.8 $\pm$ 18.7  | n.s.      | 90.9 $\pm$ 4.6    | n.s.             | 8.6 $\pm$ 2.6    | n.s. |
|      |      | O <sub>3</sub> | 4.20 $\pm$ 0.84   |                | 61.2 $\pm$ 10.5  |           | 88.9 $\pm$ 5.6    |                  | 8.5 $\pm$ 1.3    |      |
|      | Haba | AA             | 0.00 $\pm$ 0.00   | n.s.           | 72.9 $\pm$ 26.9  | *         | 76.3 $\pm$ 4.8    | **               | 3.4 $\pm$ 2.4    | n.s. |
|      |      | O <sub>3</sub> | 0.00 $\pm$ 0.00   |                | 65.4 $\pm$ 15.9  |           | 70.5 $\pm$ 3.3    |                  | 3.5 $\pm$ 2.3    |      |
| 2010 | Sasa | AA             | 1.00 $\pm$ 1.41   | **             | 44.6 $\pm$ 14.8  | **        | 87.9 $\pm$ 3.2    | **               | 6.5 $\pm$ 2.1    | n.s. |
|      |      | O <sub>3</sub> | 3.40 $\pm$ 0.55   |                | 56.8 $\pm$ 14.1  |           | 84.6 $\pm$ 4.5    |                  | 7.2 $\pm$ 1.6    |      |
|      | Haba | AA             | 0.20 $\pm$ 0.45   | *              | 43.1 $\pm$ 14.9  | **        | 73.2 $\pm$ 6.1    | **               | 3.7 $\pm$ 0.9    | **   |
|      |      | O <sub>3</sub> | 1.20 $\pm$ 1.10   |                | 52.7 $\pm$ 16.2  |           | 65.6 $\pm$ 4.0    |                  | 4.6 $\pm$ 1.0    |      |
|      |      | Panicle (cm)   |                   | Panicle number |                  | FGN       |                   | SGN              |                  |      |
| 2009 | Sasa | AA             | 18.9 $\pm$ 1.7    | *              | 8.4 $\pm$ 2.6    | n.s.      | 649.4 $\pm$ 194.2 | n.s.             | 33.4 $\pm$ 22.1  | **   |
|      |      | O <sub>3</sub> | 18.2 $\pm$ 1.1    |                | 8.4 $\pm$ 1.4    |           | 598.6 $\pm$ 113.2 |                  | 52.2 $\pm$ 28.1  |      |
|      | Haba | AA             | 23.7 $\pm$ 1.5    | *              | 4.5 $\pm$ 1.5    | n.s.      | 700.9 $\pm$ 262.5 | n.s.             | 123.9 $\pm$ 56.1 | **   |
|      |      | O <sub>3</sub> | 22.4 $\pm$ 3.1    |                | 4.7 $\pm$ 1.1    |           | 629.0 $\pm$ 154.8 |                  | 205.9 $\pm$ 66.8 |      |
| 2010 | Sasa | AA             | 20.1 $\pm$ 1.0    | n.s.           | 6.7 $\pm$ 2.1    | n.s.      | 608.7 $\pm$ 224.1 | n.s.             | 34.0 $\pm$ 17.3  | n.s. |
|      |      | O <sub>3</sub> | 20.1 $\pm$ 1.1    |                | 7.2 $\pm$ 1.6    |           | 627.1 $\pm$ 148.4 |                  | 35.0 $\pm$ 18.8  |      |
|      | Haba | AA             | 24.6 $\pm$ 1.7    | **             | 3.7 $\pm$ 0.9    | **        | 650.1 $\pm$ 240.0 | n.s.             | 65.0 $\pm$ 26.0  | **   |
|      |      | O <sub>3</sub> | 22.5 $\pm$ 1.2    |                | 4.6 $\pm$ 1.0    |           | 616.6 $\pm$ 163.3 |                  | 84.3 $\pm$ 37.8  |      |
|      |      | TGN            |                   | NFP            |                  | TGW (g)   |                   | Filling rate (%) |                  |      |
| 2009 | Sasa | AA             | 683.8 $\pm$ 203.1 | n.s.           | 78.1 $\pm$ 9.0   | **        | 21.2 $\pm$ 1.0    | n.s.             | 95.0 $\pm$ 2.7   | **   |
|      |      | O <sub>3</sub> | 650.8 $\pm$ 115.8 |                | 71.5 $\pm$ 8.9   |           | 21.2 $\pm$ 0.7    |                  | 91.9 $\pm$ 4.5   |      |
|      | Haba | AA             | 918.1 $\pm$ 255.4 | *              | 154.1 $\pm$ 25.3 | **        | 25.1 $\pm$ 1.0    | **               | 85.1 $\pm$ 2.4   | **   |
|      |      | O <sub>3</sub> | 788.2 $\pm$ 174.3 |                | 135.4 $\pm$ 16.5 |           | 22.5 $\pm$ 0.3    |                  | 75.4 $\pm$ 5.5   |      |
| 2010 | Sasa | AA             | 642.7 $\pm$ 235.8 | n.s.           | 92.1 $\pm$ 18.5  | n.s.      | 23.1 $\pm$ 1.2    | **               | 94.7 $\pm$ 0.0   | n.s. |
|      |      | O <sub>3</sub> | 662.1 $\pm$ 156.9 |                | 87.2 $\pm$ 10.2  |           | 22.5 $\pm$ 0.6    |                  | 94.7 $\pm$ 0.0   |      |
|      | Haba | AA             | 715.0 $\pm$ 258.6 | n.s.           | 173.3 $\pm$ 41.7 | **        | 23.4 $\pm$ 10.7   | n.s.             | 90.3 $\pm$ 0.0   | **   |
|      |      | O <sub>3</sub> | 700.9 $\pm$ 190.0 |                | 135.7 $\pm$ 22.0 |           | 19.9 $\pm$ 1.0    |                  | 88.0 $\pm$ 0.0   |      |

**S1 Table C. LC conditions.** MeCN, methyl cyanide (acetonitrile); SA, Salicylic acid.

| Method No. | Hormone | Solvent A                             | Solvent B                            | Gradient (composition of solvent B) |
|------------|---------|---------------------------------------|--------------------------------------|-------------------------------------|
| 1          | Acid    | Water containing<br>0.01% acetic acid | MeCN containing<br>0.05% acetic acid | 3 to 50% 20 min                     |
| 2          | Base    | Water containing<br>0.01% acetic acid | MeCN containing<br>0.2% acetic acid  | 3 to 97% 16 min                     |
| 3          | SA      | Water containing<br>0.01% formic acid | MeCN containing<br>0.1% acetic acid  | 3 to 98% 10 min                     |

**S1 Table D. Parameters for LC-ESI-MS/MS analysis (Agilent 1260-6410).** GA<sub>1</sub>, gibberellin A<sub>1</sub>; IAA, indole-3-acetic acid; ABA, abscisic acid; JA, jasmonic acid; GA<sub>4</sub>, gibberellin A<sub>4</sub>; JA-Ile, jasmonoyl-L-isoleucine; tZ, *trans*-zeatin; DHZ, dihydrozeatin; iP, N<sup>6</sup>-isopentenyladenine; SA, salicylic acid.

|                                      | LC method | Retention time on<br>LC (min) | ESI | MS/MS transitions for<br>quantifications ( <i>m/z</i> ) | Collision energy<br>(V) | Fragment or<br>(V) |
|--------------------------------------|-----------|-------------------------------|-----|---------------------------------------------------------|-------------------------|--------------------|
| GA <sub>1</sub>                      | 1         | 9.0                           | –   | 347/273                                                 | 18                      | 160                |
| D <sub>2</sub> -GA <sub>1</sub>      |           |                               |     | 349/275                                                 |                         |                    |
| IAA                                  | 1         | 10.0                          | +   | 176/130                                                 | 10                      | 90                 |
| D <sub>2</sub> -IAA                  |           |                               |     | 178/132                                                 |                         |                    |
| D <sub>7</sub> -IAA                  |           |                               |     | 183/135, 136, 137                                       |                         |                    |
| ABA                                  | 1         | 12.6                          | –   | 263/153                                                 | 05                      | 130                |
| D <sub>6</sub> -ABA                  |           |                               |     | 269/159                                                 |                         |                    |
| JA                                   | 1         | 14.4                          | –   | 209/59                                                  | 15                      | 135                |
| D <sub>2</sub> -JA                   |           |                               |     | 211/59                                                  |                         |                    |
| GA <sub>4</sub>                      | 1         | 17.0                          | –   | 331.2/257                                               | 18                      | 160                |
| D <sub>2</sub> -GA <sub>4</sub>      |           |                               |     | 331.2/259                                               |                         |                    |
| JA-Ile                               | 1         | 18.0                          | –   | 321.2/130                                               | 14                      | 140                |
| <sup>13</sup> C <sub>6</sub> -JA-Ile |           |                               |     | 338.4/136.2                                             |                         |                    |
| tZ                                   | 2         | 8.5                           | +   | 220.3/136.3                                             | 8                       | 100                |
| D <sub>5</sub> -tZ                   |           |                               |     | 225.3/136.3, 137.3                                      |                         |                    |
| DHZ                                  | 2         | 8.6                           | +   | 222.2/136.2                                             | 8                       | 140                |
| D <sub>3</sub> -DHZ                  |           |                               |     | 225.2/136.2                                             |                         |                    |
| iP                                   | 2         | 12.6                          | +   | 204.4/136.4                                             | 8                       | 110                |
| D <sub>6</sub> -iP                   |           |                               |     | 210.4/137.4                                             |                         |                    |
| SA                                   | 3         | 5.6                           | –   | 137/93                                                  | 12                      | 90                 |
| D <sub>4</sub> -SA                   |           |                               |     | 141/97                                                  |                         |                    |

**S1 Table E. Effects of exposure to elevated ozone on grain yield and plant growth parameters in SHA422-1.3, SHA422-1.1, Sasanishiki and Habataki (2011).** Values show mean  $\pm$  SD ( $n = 36$ ). Bars topped by the same letters are not significantly different (Tukey's HSD test,  $P < 0.05$ ). NF, non-filtered air (converted values); O<sub>3</sub>, elevated ozone. Sasa, Sasanishiki; Haba, Habataki. FGN, filled-grain number; SGN, sterile grain number; TGN, total grain number; NFP, number of filled grain per panicle; TGW, a thousand grain weight.

|      |         | Biomass (g)    |                   | Culm (cm)   |                  | Culm number |                   | Panicle number   |                   |     |
|------|---------|----------------|-------------------|-------------|------------------|-------------|-------------------|------------------|-------------------|-----|
| 2011 | SHA     | NF             | 53.8 $\pm$ 11.7   | a           | 86.5 $\pm$ 4.6   | a           | 8.9 $\pm$ 1.9     | ab               | 9.0 $\pm$ 1.9     | a   |
|      | 422-1.3 | O <sub>3</sub> | 34.7 $\pm$ 10.9   | b           | 79.4 $\pm$ 7.4   | bc          | 7.0 $\pm$ 1.8     | c                | 6.8 $\pm$ 2.0     | b   |
|      | SHA     | NF             | 45.7 $\pm$ 14.1   | a           | 76.8 $\pm$ 5.7   | cde         | 7.4 $\pm$ 2.3     | bc               | 7.4 $\pm$ 2.3     | b   |
|      | 422-1.1 | O <sub>3</sub> | 35.3 $\pm$ 12.3   | b           | 74.2 $\pm$ 6.3   | de          | 7.3 $\pm$ 2.1     | c                | 7.1 $\pm$ 2.2     | b   |
|      | Sasa    | NF             | 49.1 $\pm$ 12.9   | a           | 82.4 $\pm$ 4.6   | ab          | 9.1 $\pm$ 2.6     | ab               | 9.1 $\pm$ 2.6     | a   |
|      |         | O <sub>3</sub> | 35.8 $\pm$ 16.3   | b           | 78.8 $\pm$ 7.8   | bcd         | 8.2 $\pm$ 2.9     | abc              | 8.1 $\pm$ 3.0     | ab  |
|      | Haba    | NF             | 51.2 $\pm$ 14.3   | a           | 72.6 $\pm$ 5.8   | de          | 5.0 $\pm$ 1.4     | d                | 4.7 $\pm$ 1.3     | c   |
|      |         | O <sub>3</sub> | 32.9 $\pm$ 13.3   | b           | 61.2 $\pm$ 8.7   | f           | 4.8 $\pm$ 1.6     | d                | 4.6 $\pm$ 1.6     | c   |
|      |         | Panicle (cm)   |                   | Panicle (g) |                  | FGN         |                   | SGN              |                   |     |
| 2011 | SHA     | NF             | 19.8 $\pm$ 1.0    | cd          | 20.1 $\pm$ 4.9   | a           | 725.2 $\pm$ 157.2 | ab               | 102.2 $\pm$ 33.8  | cd  |
|      | 422-1.3 | O <sub>3</sub> | 19.4 $\pm$ 1.6    | d           | 12.8 $\pm$ 4.4   | de          | 483.9 $\pm$ 176.5 | de               | 90.6 $\pm$ 36.8   | d   |
|      | SHA     | NF             | 21.0 $\pm$ 1.1    | b           | 16.8 $\pm$ 5.6   | abc         | 607.6 $\pm$ 197.8 | bcd              | 123.0 $\pm$ 50.8  | cd  |
|      | 422-1.1 | O <sub>3</sub> | 20.6 $\pm$ 1.2    | bc          | 14.3 $\pm$ 4.8   | cde         | 506.9 $\pm$ 180.6 | cde              | 191.0 $\pm$ 73.9  | ab  |
|      | Sasa    | NF             | 19.6 $\pm$ 0.9    | cd          | 20.5 $\pm$ 5.6   | a           | 760.4 $\pm$ 199.4 | a                | 74.4 $\pm$ 35.3   | d   |
|      |         | O <sub>3</sub> | 19.5 $\pm$ 1.6    | cd          | 13.7 $\pm$ 6.7   | cde         | 415.8 $\pm$ 278.2 | e                | 166.3 $\pm$ 92.6  | bc  |
|      | Haba    | NF             | 24.3 $\pm$ 1.1    | a           | 17.2 $\pm$ 5.6   | ab          | 639.7 $\pm$ 207.0 | abc              | 132.4 $\pm$ 53.1  | bcd |
|      |         | O <sub>3</sub> | 21.3 $\pm$ 3.0    | b           | 11.8 $\pm$ 5.8   | e           | 487.4 $\pm$ 253.8 | cde              | 248.5 $\pm$ 197.6 | a   |
|      |         | TGN            |                   | NFP         |                  | TGW (g)     |                   | Filling rate (%) |                   |     |
| 2011 | SHA     | NF             | 817.5 $\pm$ 172.0 | a           | 81.6 $\pm$ 12.6  | cd          | 24.7 $\pm$ 0.7    | a                | 88.7 $\pm$ 3.3    | ab  |
|      | 422-1.3 | O <sub>3</sub> | 574.4 $\pm$ 203.8 | bc          | 69.5 $\pm$ 10.8  | d           | 23.4 $\pm$ 1.3    | abc              | 83.6 $\pm$ 5.1    | bc  |
|      | SHA     | NF             | 721.1 $\pm$ 230.2 | abc         | 82.8 $\pm$ 10.8  | cd          | 23.8 $\pm$ 0.6    | ab               | 84.0 $\pm$ 4.1    | bc  |
|      | 422-1.1 | O <sub>3</sub> | 697.9 $\pm$ 244.4 | abc         | 70.4 $\pm$ 11.3  | cd          | 22.9 $\pm$ 1.2    | abc              | 72.1 $\pm$ 4.8    | d   |
|      | Sasa    | NF             | 829.1 $\pm$ 220.8 | a           | 84.4 $\pm$ 10.0  | c           | 21.5 $\pm$ 1.0    | c                | 91.8 $\pm$ 2.3    | a   |
|      |         | O <sub>3</sub> | 560.7 $\pm$ 301.1 | c           | 50.7 $\pm$ 20.7  | e           | 22.1 $\pm$ 7.3    | bc               | 71.9 $\pm$ 14.8   | d   |
|      | Haba    | NF             | 758.7 $\pm$ 225.0 | abc         | 135.3 $\pm$ 26.5 | a           | 23.1 $\pm$ 1.0    | abc              | 82.3 $\pm$ 6.8    | c   |
|      |         | O <sub>3</sub> | 735.9 $\pm$ 424.5 | abc         | 101.3 $\pm$ 37.8 | b           | 19.1 $\pm$ 3.9    | d                | 67.2 $\pm$ 10.4   | d   |

**S1 Table F. Overrepresented attributes for the 275 genes that responded under elevated ozone condition found by gene enrichment analysis.** The genes subset were extracted from microarray data by the filtering criteria as below: the fold change in Habataki  $\geq 2$  and that in Sasanishiki  $\leq 0.5$  compared with ambient air condition. The genes that have unknown functions or no GO term were not contained this data set.  $N_{\text{SUBSET}}$  and  $N_{\text{ALL}}$  indicate the number of genes in subset and microarray including GO ID, respectively. This table shows only attribute ID with  $P_{\text{ADJ}} < 0.05$ .

| Attribute ID | Attribute name                           | $N_{\text{SUBSET}}$ | $N_{\text{ALL}}$ | LOD   | $P$ value | $P_{\text{ADJ}}$ |
|--------------|------------------------------------------|---------------------|------------------|-------|-----------|------------------|
| GO:0044699   | Single-organism process                  | 10                  | 189              | 0.868 | 3.73E-06  | 0.002            |
| GO:0009733   | Response to auxin stimulus               | 6                   | 48               | 1.224 | 5.19E-06  | 0.005            |
| GO:0005516   | Calmodulin binding                       | 4                   | 20               | 1.571 | 1.28E-05  | 0.008            |
| GO:0007154   | Cell communication                       | 5                   | 38               | 1.352 | 8.67E-06  | 0.008            |
| GO:0007165   | Signal transduction                      | 5                   | 38               | 1.352 | 8.67E-06  | 0.008            |
| GO:0023052   | Signaling                                | 5                   | 38               | 1.352 | 8.67E-06  | 0.008            |
| GO:0044700   | Single organism signaling                | 5                   | 38               | 1.352 | 8.67E-06  | 0.008            |
| GO:0009734   | Auxin mediated signaling pathway         | 4                   | 21               | 1.545 | 1.57E-05  | 0.011            |
| GO:0071365   | Cellular response to auxin stimulus      | 4                   | 21               | 1.545 | 1.57E-05  | 0.011            |
| GO:0009719   | Response to endogenous stimulus          | 6                   | 59               | 1.123 | 1.75E-05  | 0.013            |
| GO:0009725   | Response to hormone stimulus             | 6                   | 59               | 1.123 | 1.75E-05  | 0.013            |
| GO:0010033   | Response to organic substance            | 6                   | 59               | 1.123 | 1.75E-05  | 0.013            |
| GO:0051716   | Cellular response to stimulus            | 5                   | 44               | 1.280 | 1.81E-05  | 0.014            |
| GO:0009755   | Hormone-mediated signaling pathway       | 4                   | 23               | 1.498 | 2.30E-05  | 0.018            |
| GO:0032870   | Cellular response to hormone stimulus    | 4                   | 23               | 1.498 | 2.30E-05  | 0.018            |
| GO:0070887   | Cellular response to chemical stimulus   | 4                   | 23               | 1.498 | 2.30E-05  | 0.018            |
| GO:0071310   | Cellular response to organic substance   | 4                   | 23               | 1.498 | 2.30E-05  | 0.018            |
| GO:0071495   | Cellular response to endogenous stimulus | 4                   | 23               | 1.498 | 2.30E-05  | 0.018            |
| GO:0042221   | Response to chemical stimulus            | 6                   | 64               | 1.085 | 2.80E-05  | 0.022            |

**S1 Table G. Effects of exposure to elevated ozone on the amounts of phytohormones ( $\mu\text{g gFW}^{-1}$ ) in inflorescence meristems and flag leaves.** Values show mean  $\pm$  SD ( $n = 3$ ). n.d., not detected. Values followed by the same letters are not significantly different (Tukey's HSD test,  $P < 0.05$ ). IAA, indole-3-acetic acid; tZ, *trans*-zeatin; iP, N6-isopentenyladenine; SA, salicylic acid; GA<sub>1</sub>, GA<sub>4</sub>, gibberellins A<sub>1</sub> and A<sub>4</sub>, respectively. AA, ambient air; O<sub>3</sub>, elevated ozone.

### Inflorescence meristems

|             |                | IAA            |   | tZ              |   | iP              |   | SA               |   | GA <sub>1</sub> , GA <sub>4</sub> |
|-------------|----------------|----------------|---|-----------------|---|-----------------|---|------------------|---|-----------------------------------|
| Sasanishiki | AA             | 47.4 $\pm$ 3.8 | a | 0.34 $\pm$ 0.05 | a | 0.18 $\pm$ 0.05 | a | 116.0 $\pm$ 3.3  | a | n.d.                              |
|             | O <sub>3</sub> | 22.4 $\pm$ 7.0 | a | 0.38 $\pm$ 0.09 | a | 0.16 $\pm$ 0.09 | a | 191.4 $\pm$ 11.8 | a | n.d.                              |
| Habataki    | AA             | 14.8 $\pm$ 6.9 | a | 0.29 $\pm$ 0.03 | a | 0.09 $\pm$ 0.03 | a | 72.0 $\pm$ 4.0   | a | n.d.                              |
|             | O <sub>3</sub> | 19.3 $\pm$ 0.9 | a | 0.47 $\pm$ 0.01 | a | 0.01 $\pm$ 0.01 | a | 182.2 $\pm$ 2.3  | a | n.d.                              |

### Flag leaves

|             |                | IAA            |   | tZ              |   | iP              |   | SA ( $\times 10^{-3}$ ) |   | GA <sub>1</sub> , GA <sub>4</sub> |
|-------------|----------------|----------------|---|-----------------|---|-----------------|---|-------------------------|---|-----------------------------------|
| Sasanishiki | AA             | 8.35 $\pm$ 1.8 | a | 0.07 $\pm$ 0.03 | a | 0.26 $\pm$ 0.09 | a | 4.25 $\pm$ 1.05         | a | n.d.                              |
|             | O <sub>3</sub> | 1.96 $\pm$ 0.3 | a | 0.09 $\pm$ 0.07 | a | 0.47 $\pm$ 0.09 | a | 2.60 $\pm$ 0.32         | b | n.d.                              |
| Habataki    | AA             | 8.56 $\pm$ 1.9 | a | 0.08 $\pm$ 0.07 | a | 0.43 $\pm$ 0.39 | a | 2.09 $\pm$ 0.30         | b | n.d.                              |
|             | O <sub>3</sub> | 9.61 $\pm$ 1.6 | a | 0.20 $\pm$ 0.06 | a | 4.96 $\pm$ 0.30 | b | 1.77 $\pm$ 0.13         | b | n.d.                              |

**S1 Fig. A. Daily ozone exposure in the glasshouse in 2009 and 2010.** Values represent mean ozone concentrations, measured every hour and averaged from (○) May 21 to September 25 in 2009 and (□) June 8 to September 28 in 2010.

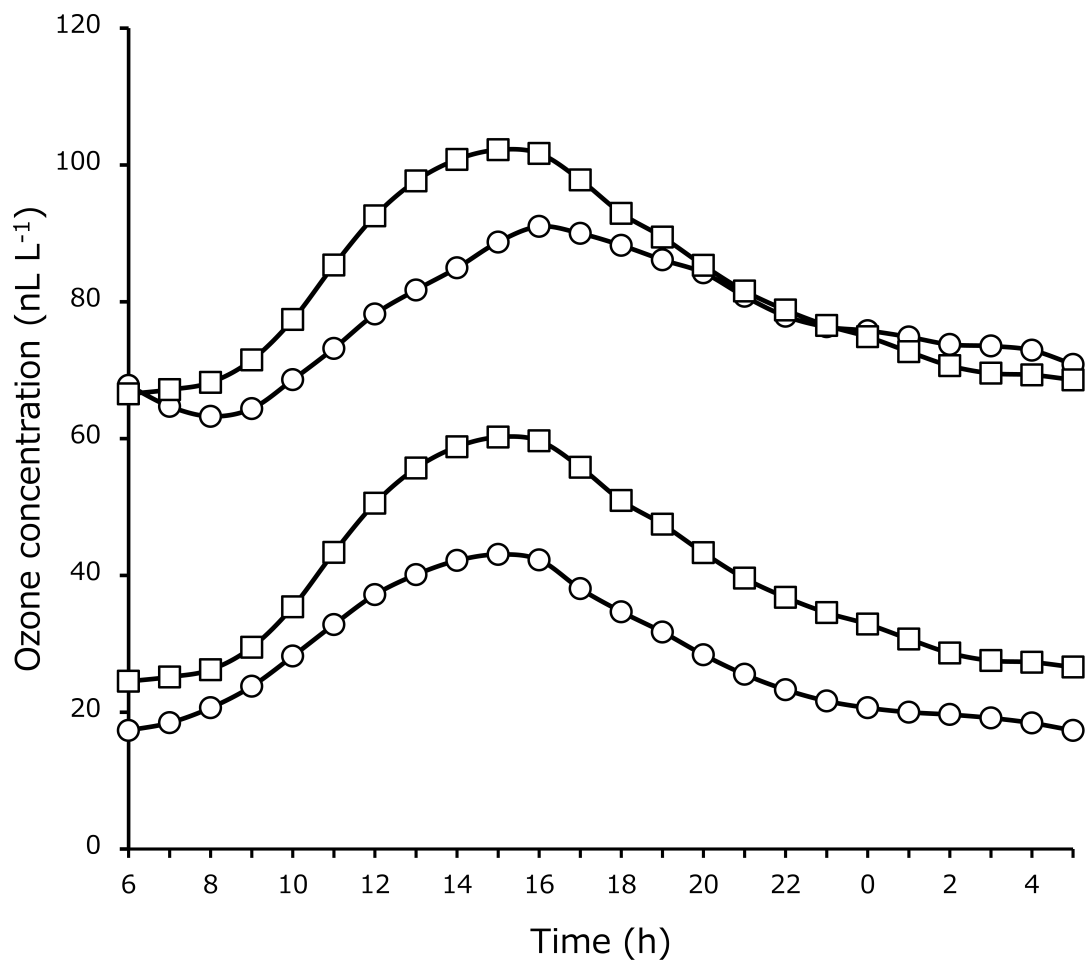

**S1 Fig. B. Backbone ribbon representation of the F-box domains of APO1 from Sasanishiki and Habataki.**

The structures were modeled in SWISS-MODEL [25-27]. Conserved hydrophobic residues are highlighted (white). The single amino acid substitution in Habataki (Ile39Val, blue) probably does not affect the F-box domain structure.

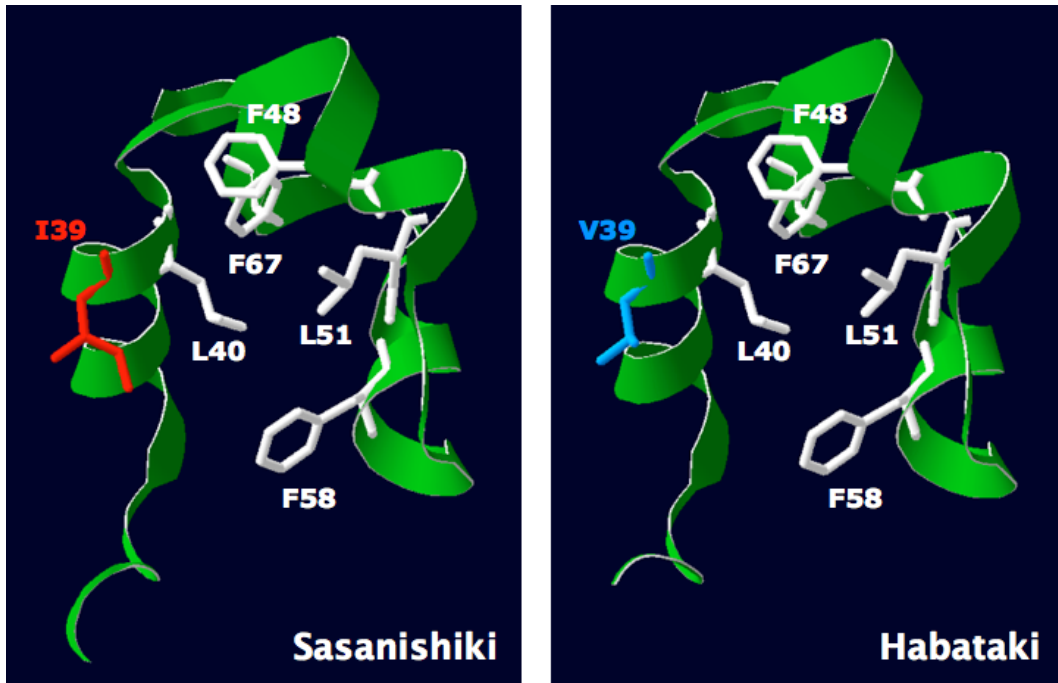



**S1 Fig. C. Ozone-induced changes in the *APO1* transcript level in inflorescence meristems of SHA422-1.3 and SHA422-1.1.** The data are actual measured values ( $n = 1$ ). CF, charcoal-filtered air; O<sub>3</sub>, elevated ozone.

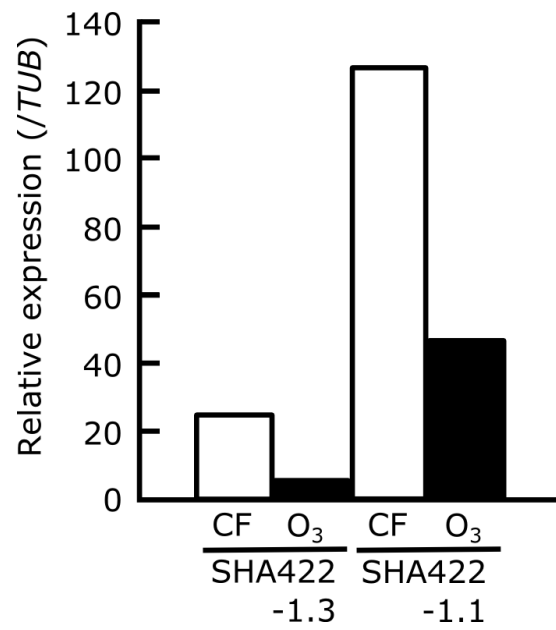

Supplement: pone.0123308.s001.pdf [file pone.0123308.s001.pdf]
